# Supplementary material for: Identification of Mobile Colistin Resistance Gene mcr-10 in Disinfectant and Antibiotic Resistant Escherichia coli from Disinfected Tableware
Source: MDPI journal article supplement (doi:10.3390/antibiotics11070883), 2022-07-01
Supplement: s1 [file s1]

**Table S1. Information of plasmids with the five highest matched plasmids to pMCR\_10\_2641 in NCBI.**

| Subject ID | Length (bp) | Query cover (%) | Identity (%) | Description                                               |
|------------|-------------|-----------------|--------------|-----------------------------------------------------------|
| CP040383   | 194556      | 45.34           | 99.99        | <i>Escherichia coli</i> strain A1_180 plasmid unnamed2    |
| CP025740   | 160682      | 43.43           | 100          | <i>Escherichia coli</i> strain Ec40 plasmid unnamed       |
| CP041047   | 301036      | 32.22           | 98.34        | <i>Citrobacter sp.</i> CF971 plasmid pBM527-1,            |
| CP026206   | 191344      | 40.58           | 100          | <i>Escherichia coli</i> strain ECONIH5 plasmid pECO-cbb3, |
| CP023978   | 213341      | 36.69           | 96.43        | <i>Klebsiella variicola</i> strain X39 plasmid pX39-1,    |

**Table S2. Plasmids carrying *mcr-10* gene on NCBI.**

| Species                           | Strain       | Plasmid Name  | Plasmid Replicons | Size (bp) | Country | Year | Accession no.   |
|-----------------------------------|--------------|---------------|-------------------|-----------|---------|------|-----------------|
| <i>Enterobacter roggenkampii</i>  | WCHER090065  | pMCR10_090065 | IncFIA            | 71775     | China   | 2019 | CP045065        |
| <i>Cronobacter sakazakii</i>      | 145005       | pMCR10_145005 | IncFIB            | 120500    | China   | 2021 | JABTXY010000030 |
| <i>Enterobacter roggenkampii</i>  | Ecl_20_981   | pECL981-1     | IncFIB            | 161986    | China   | 2020 | CP048651        |
| <i>Enterobacter roggenkampii</i>  | Er_20_983    | pEr983-1      | IncFIB            | 100102    | China   | 2020 | CP060738        |
| <i>Raoultella ornithinolytica</i> | FDAARGOS_431 | unnamed1      | IncFIB            | 231294    | USA     | 2017 | CP023893        |
| <i>Citrobacter freundii</i>       | B38          | pOZ172        | IncFIB            | 127005    | China   | 2001 | CP016763        |
| <i>Raoultella ornithinolytica</i> | NUITM-VR1    | pNUITM-VR1_2  | IncFIB            | 261835    | Japan   | 2021 | AP025011        |
| <i>Enterobacter hormaechei</i>    | ECC59        | pECC59-2      | ND                | 64293     | China   | 2021 | CP080472        |

|                                   |                   |                      |        |        |           |      |          |
|-----------------------------------|-------------------|----------------------|--------|--------|-----------|------|----------|
| <i>Enterobacter cloacae</i>       | En37              | pEN37S               | IncFIB | 70277  | Japan     | 2021 | AP024497 |
| <i>Enterobacter roggenkampii</i>  | STW0522-66        | pSTW0522-66-1        | IncFIB | 324199 | Japan     | 2020 | AP022466 |
| <i>Enterobacter kobei</i>         | STW0522-51        | pSTW0522-51-1        | ND     | 159829 | Japan     | 2020 | AP022432 |
| <i>Enterobacter asburiae</i>      | RHBSTW-01009      | pRHBSTW-01009_2      | IncFIB | 70650  | UK        | 2020 | CP056127 |
| <i>Enterobacter cloacae</i>       | RHBSTW-00399      | pRHBSTW-00399_2      | IncFII | 137623 | UK        | 2020 | CP056561 |
| <i>Enterobacter roggenkampii</i>  | OIPH-N260         | pN260-2              | IncFIB | 244996 | Japan     | 2020 | AP023449 |
| <i>Enterobacter roggenkampii</i>  | YK16              | pYK16-mcr-10         | IncFII | 117855 | China     | 2020 | MT468575 |
| <i>Enterobacter r. sp.</i>        | 18A13             | pECC18A13-1          | IncFII | 150509 | Japan     | 2019 | AP019635 |
| <i>Enterobacter r. sp.</i>        | RHBSTW-00175      | pRHBSTW-00175_3      | IncFIB | 68715  | UK        | 2020 | CP055932 |
| <i>Enterobacter cloacae</i>       | PIMB10EC27        | pEC27-2              | IncFIA | 84602  | Viet Nam  | 2018 | CP020091 |
| <i>Klebsiella quasipneumoniae</i> | SB610             | pKqs_SB610_4         | IncFIB | 124980 | Australia | 2021 | CP084774 |
| <i>Klebsiella pneumoniae</i>      | INF133-sc-2279960 | pINF133-sc-2279960_5 | IncFII | 120029 | Australia | 2020 | LR890193 |

ND, not detected; bp, base pair.

**Table S4. The PT-qPCR oligonucleotide primer sequences used in this study.**

| Primer use and target gene | Nucleotide sequence (5'→3')                      | Amplicon size (bp) | Annealing temperature (°C) |
|----------------------------|--------------------------------------------------|--------------------|----------------------------|
| <i>16s</i>                 | F: TCCACGATTACTAGCGATTC<br>R: AGCAAGCGGACCTCATAA | 87                 | 55                         |
| <i>mcr-10</i>              | F: ACCTGCTATGACGATGTTAT<br>R: TGAAGTGACGATGCTCTG | 124                | 55                         |

F, forward; R, reverse; bp, base pair

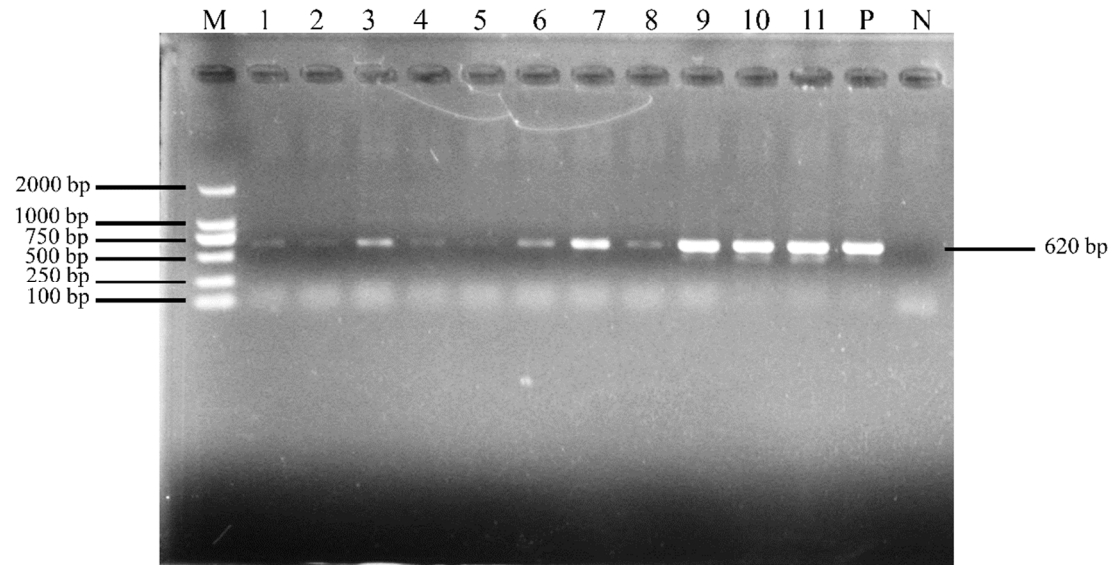

**Figure S1. Agarose gel electrophoresis of the *mcr-10* PCR product from DNA extracts of the transconjugants.** M lane is marker; lanes 1-11 are transconjugants; P lane is *mcr-10* carrying strain EC2641 as a positive control; N lane is using recipient bacterium J53 as a negative control. *mcr-10* amplification product size is 620 bp.

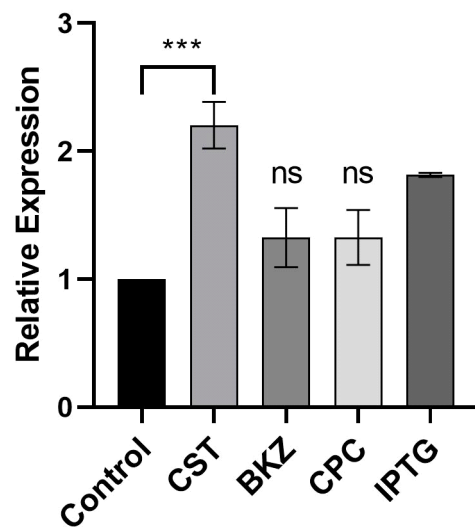

**Figure S2. Relative expression of the resistance gene *mcr-10* in *Escherichia coli* EC2641 (the original host of *mcr-10* gene) under colistin, benzalkonium chloride, Cetylpyridinium Chloride and IPTG stress.** CST, colistin; BKZ, benzalkonium chloride; CPC, Cetylpyridinium Chloride; IPTG, Isopropyl- $\beta$ -D-thiogalactopyranoside. and antibiotic free LB was used as control. The data are shown as the means  $\pm$  SD of the results from three individual assays. ns,  $p > 0.05$ ; \*\*\*,  $p < 0.001$ .
